# Supplementary material for: Autoantibody Signatures Combined with Epstein–Barr Virus Capsid Antigen-IgA as a Biomarker Panel for the Detection of Nasopharyngeal Carcinoma
Source: Oxford University Press journal article supplement (doi:10.1158/1940-6207.capr-14-0397), 2015-05-19
Supplement: 19406207capr140397-sup-140432_3_supp_2942828_nmyxzx.doc [file 19406207capr140397-sup-140432_3_supp_2942828_nmyxzx.doc]

| **[Supplementary Table](http://www.ncbi.nlm.nih.gov/pmc/articles/PMC4138720/" \l "SD2) 2.** **The regression equations and optimum probabilities of the combinations of different markers** | | |
| --- | --- | --- |
| Combination | Regression equation [ ln(p/(1-p)) =] | Optimum predicted probability |
| The autoantibody panel | 12.625×(p53)+10.248×(NY-ESO-1)-2.986×(Prx-6)+7.123×(Bmi-1)-4.136×(MMP7)+13.850×(Hsp70) -2.785 | 0.646 |
| The autoantibody panel of 4 | 11.803×(p53)+10.007×(NY-ESO-1)+2.750×(Bmi-1)+12.513×(Hsp70)-3.201 | 0.672 |
| The autoantibody panel+VCA-IgA | 15.129×(p53)+8.938×(NY-ESO-1)-2.927×(Prx-6)+7.235×(Bmi-1)-3.908×(MMP7)+13.920×(Hsp70) +3.151×(VCA-IgA)-3.381 | 0.560 |
| The autoantibody panel of 4+VCA-IgA | 14.024×(p53)+8.880×(NY-ESO-1)+2.895×(Bmi-1)+12.832×(Hsp70)+3.131×(VCA-IgA)-3.783 | 0.574 |

Note: panel: autoantibodies to p53, NY-ESO-1, Prx VI, Bmi-1, Hsp70, and MMP7. panel of 4: autoantibodies to p53, NY-ESO-1, Bmi-1 and Hsp70.

The optimum predicted probabilities of the autoantibody panel, the autoantibody panel of 4, the autoantibody panel+VCA-IgA and the autoantibody panel of 4+VCA-IgA were derived from their respective ROC curves by achieving the maximum sensitivity against the specificity of >90% as well as by minimizing the distance of the cutoff value to the top-left corner of the ROC curve.

The regression equations and optimum predicted probabilities were generated using whole NPC versus all controls in the training set.
