# Supplementary material for: Autoantibody Signatures Combined with Epstein–Barr Virus Capsid Antigen-IgA as a Biomarker Panel for the Detection of Nasopharyngeal Carcinoma
Source: Oxford University Press journal article supplement (doi:10.1158/1940-6207.capr-14-0397), 2015-05-19
Supplement: 19406207capr140397-sup-140432_3_supp_2942829_nmy9z9.doc [file 19406207capr140397-sup-140432_3_supp_2942829_nmy9z9.doc]

| **[Supplementary Table](http://www.ncbi.nlm.nih.gov/pmc/articles/PMC4138720/" \l "SD2) 3. Relationship between the expression levels of individual markers and clinical features in NPC patients in training set** | | | | | | | | | | | | | | | | | | | | | |
| --- | --- | --- | --- | --- | --- | --- | --- | --- | --- | --- | --- | --- | --- | --- | --- | --- | --- | --- | --- | --- | --- |
|  | n | p53-Abs | |  | NY-ESO-1-Abs | |  | Prx VI-Abs | |  | Bmi-1-Abs | |  | MMP7-Abs | |  | Hsp70-Abs | |  | VCA-IgA | |
|  | Absorbances | P |  | Absorbances | P |  | Absorbances | P |  | Absorbances | P |  | Absorbances | P |  | Absorbances | P |  | Absorbances | P |
| Patient age |  |  |  | |  |  | |  |  | |  |  | |  |  |  | |  |  |  |  |
| ≤50 | 112 | 0.180±0.030 | 0.063* | | 0.204±0.014 | 0.306* | | 0.142±0.012 | 0.430 | | 0.136±0.013 | 0.710 | | 0.197±0.014 | 0.947 | 0.105±0.007 | | 0.151 |  | 0.328±0.047 | 0.893 |
| >50 | 108 | 0.280±0.046 |  | | 0.255±0.027 |  | | 0.154±0.010 |  | | 0.143±0.011 |  | | 0.198±0.012 |  | 0.120±0.009 | |  |  | 0.320±0.045 |  |
| Patient gender |  |  |  | |  |  | |  |  | |  |  | |  |  |  | |  |  |  |  |
| Male | 169 | 0.211±0.029 | 0.213 | | 0.228±0.018 | 0.873 | | 0.144±0.009 | 0.337 | | 0.138±0.010 | 0.776 | | 0.196±0.011 | 0.826 | 0.111±0.007 | | 0.610 |  | 0.312±0.037 | 0.495 |
| Female | 51 | 0.292±0.068 |  | | 0.233±0.020 |  | | 0.162±0.016 |  | | 0.144±0.016 |  | | 0.201±0.015 |  | 0.118±0.008 | |  |  | 0.365±0.069 |  |
| Smoking status |  |  |  | |  |  | |  |  | |  |  | |  |  |  | |  |  |  |  |
| Smokers | 141 | 0.222±0.034 | 0.728 | | 0.231±0.021 | 0.832 | | 0.146±0.010 | 0.712 | | 0.140±0.012 | 0.853 | | 0.196±0.012 | 0.902 | 0.115±0.008 | | 0.556 |  | 0.343±0.043 | 0.447 |
| Non-smokers | 79 | 0.242±0.048 |  | | 0.225±0.016 |  | | 0.152±0.012 |  | | 0.137±0.012 |  | | 0.199±0.012 |  | 0.108±0.006 | |  |  | 0.291±0.048 |  |
| T stage |  |  |  | |  |  | |  |  | |  |  | |  |  |  | |  |  |  |  |
| T1+T2 | 91 | 0.292±0.055 | 0.571* | | 0.227±0.020 | 0.889 | | 0.146±0.012 | 0.848 | | 0.138±0.014 | 0.908 | | 0.197±0.015 | 0.979 | 0.107±0.006 | | 0.417 |  | 0.325±0.054 | 0.996 |
| T3+T4 | 129 | 0.185±0.025 |  | | 0.231±0.021 |  | | 0.149±0.011 |  | | 0.140±0.011 |  | | 0.197±0.011 |  | 0.116±0.008 | |  |  | 0.324±0.041 |  |
| N stage |  |  |  | |  |  | |  |  | |  |  | |  |  |  | |  |  |  |  |
| N0+N1 | 73 | 0.242±0.052 | 0.745 | | 0.200±0.016 | 0.539* | | 0.162±0.017 | 0.212 | | 0.135±0.014 | 0.745 | | 0.202±0.015 | 0.726 | 0.105±0.006 | | 0.712* |  | 0.302±0.056 | 0.634 |
| N2+N3 | 147 | 0.223±0.032 |  | | 0.243±0.021 |  | | 0.141±0.009 |  | | 0.141±0.011 |  | | 0.195±0.011 |  | 0.116±0.008 | |  |  | 0.335±0.043 |  |
| Overall stage |  |  |  | |  |  | |  |  | |  |  | |  |  |  | |  |  |  |  |
| I+II (early stage) | 33 | 0.298±0.099 | 0.298 | | 0.193±0.018 | 0.310 | | 0.154±0.020 | 0.741 | | 0.138±0.022 | 0.940 | | 0.189±0.023 | 0.709 | 0.090±0.022 | | 0.136* |  | 0.334±0.095 | 0.902 |
| III+IV(advanced stage) | 187 | 0.217±0.027 |  | | 0.235±0.017 |  | | 0.147±0.009 |  | | 0.139±0.009 |  | | 0.199±0.010 |  | 0.116±0.009 | |  |  | 0.323±0.035 |  |
| Note: Statistical significance was determined by the independent samples t test or Mann-Whitney’s U test (*). Abs, autoantibodies. | | | | | | | | | | | | | | | | | | | | | |
